# Supplementary figures and images for: Work participation in patients with axial spondyloarthritis: high prevalence of negative workplace experiences and long-term work impairment
Source: PubMed Central journal article supplement — RMD Open. 2023 Mar 16;9(1):e002663. doi: 10.1136/rmdopen-2022-002663 (PMC10030742; doi:10.1136/rmdopen-2022-002663), 2023-03-16

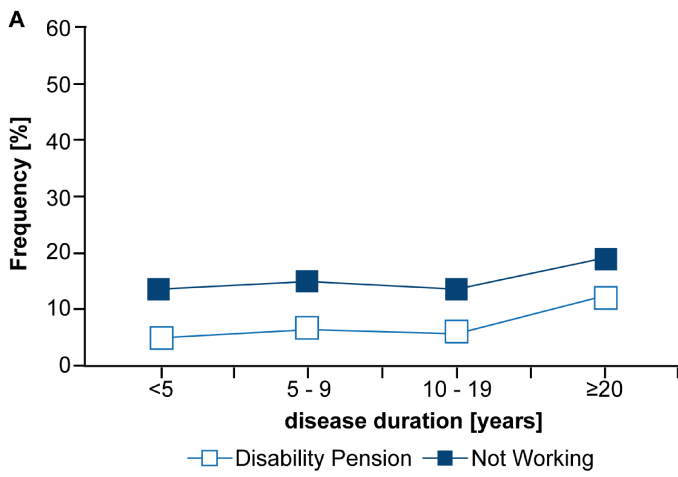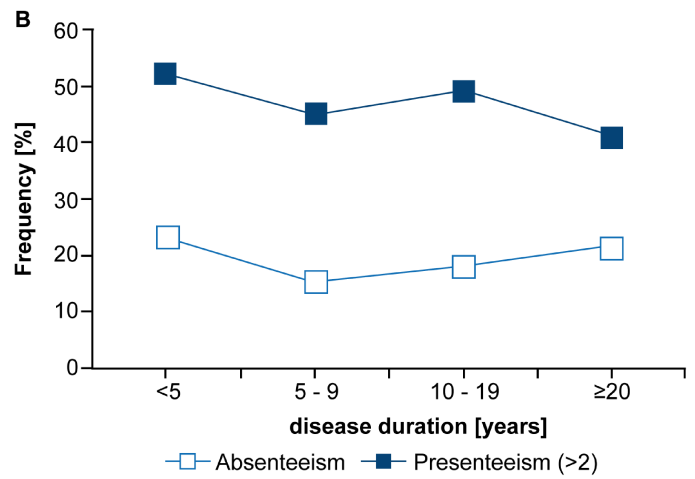

Supplement: rmdopen-2022-002663supp001.pdf [file rmdopen-2022-002663supp001.pdf]
