# Supplementary figures and images for: Work participation in patients with axial spondyloarthritis: high prevalence of negative workplace experiences and long-term work impairment
Source: HighWire-hosted journal article supplement (doi:10.1136/rmdopen-2022-002663), 2023-03-01

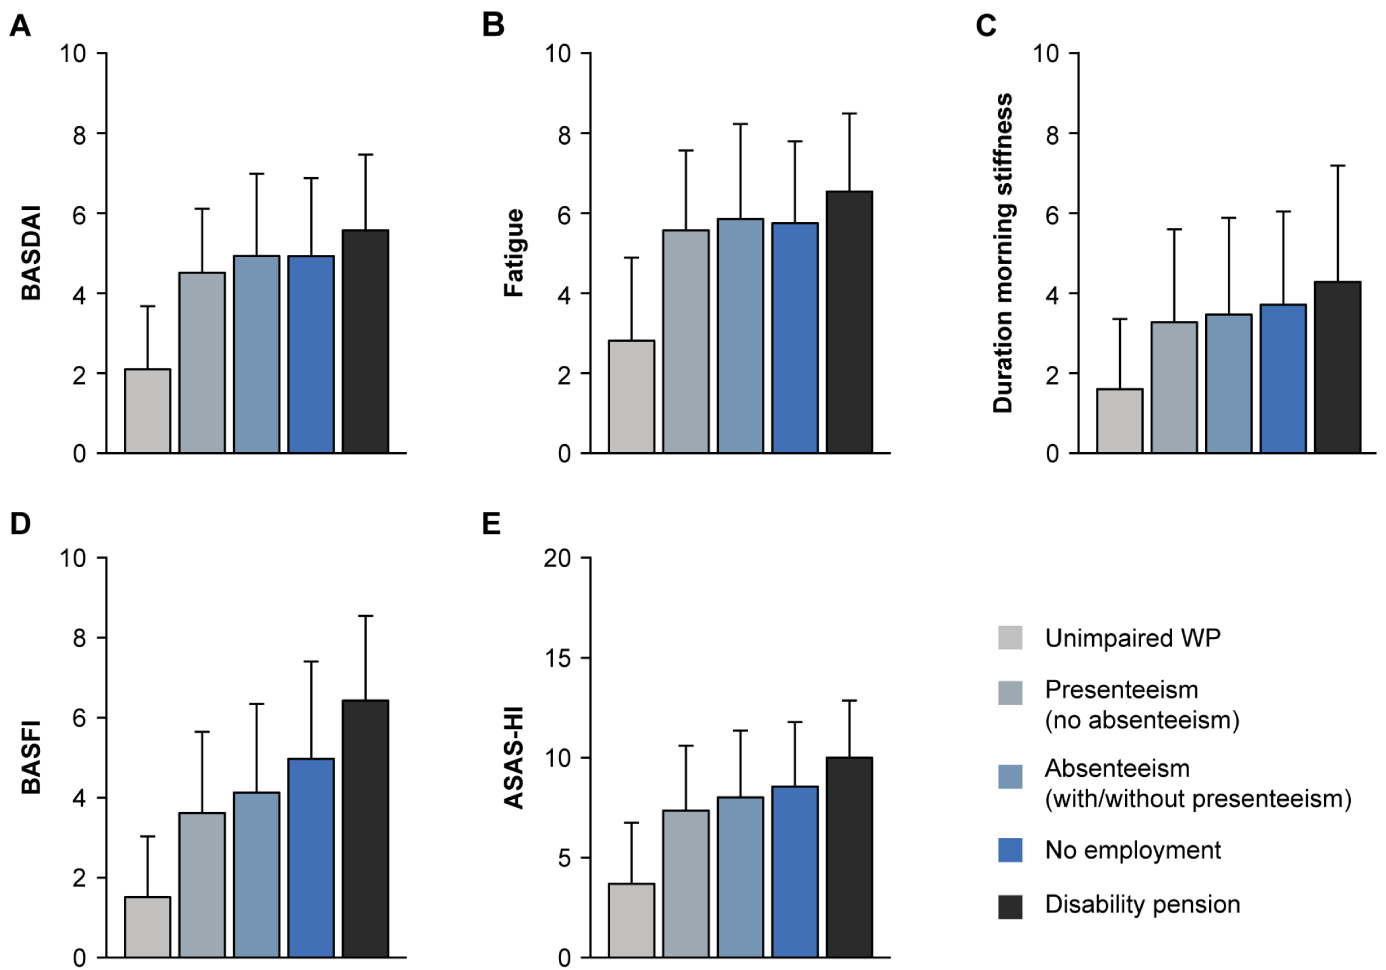

Supplement: rmdopen-2022-002663supp004_data_supplement.pdf [file rmdopen-2022-002663supp004_data_supplement.pdf]
